# Supplementary material
Source: Springer Nature journal article supplement (https://www.springermedizin.de/resource/supplementary/12879_2002_55_MOESM4_ESM.pdf/9448058)

**a**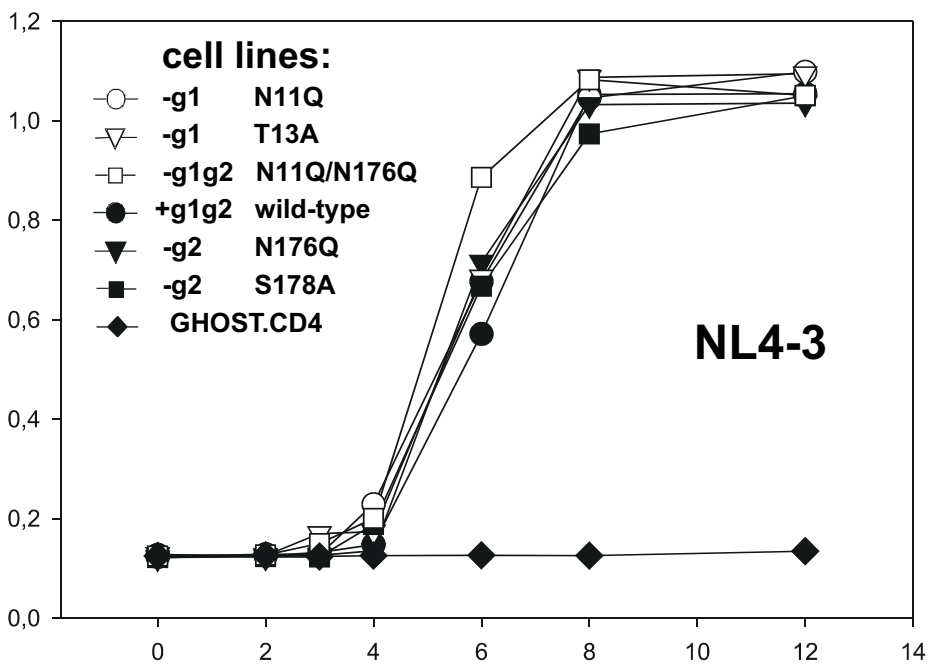**b**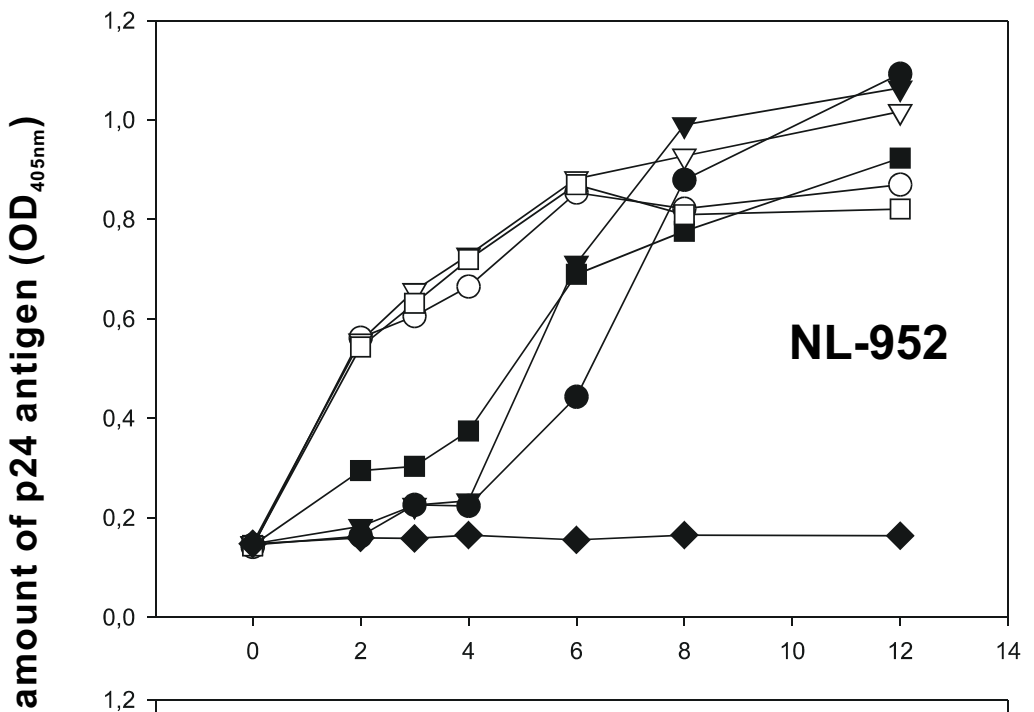**c**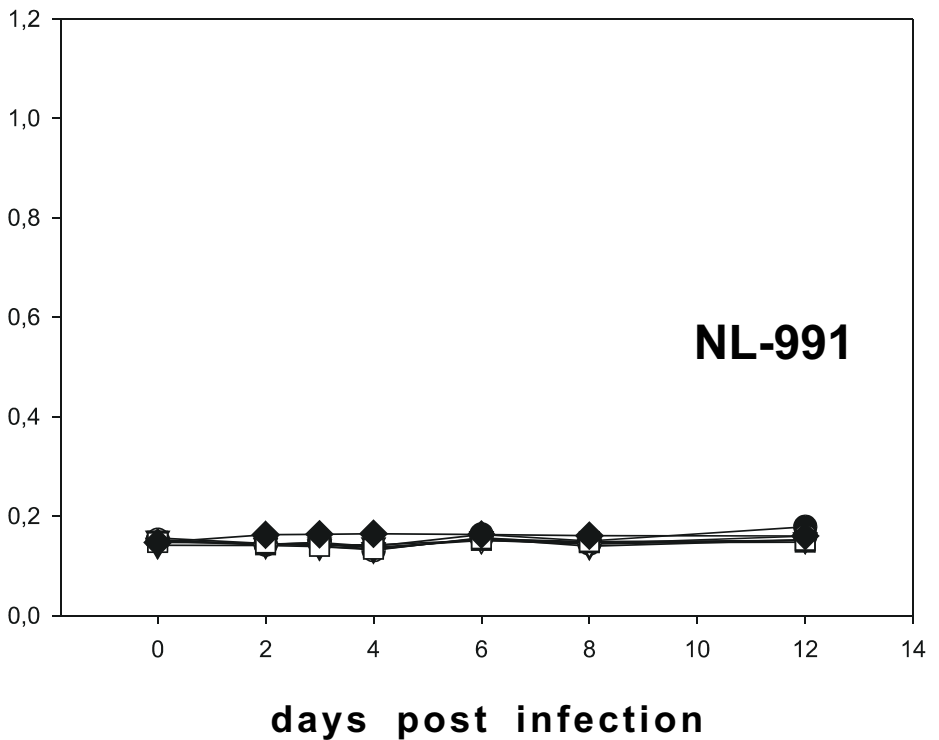

Supplement: MOESM4 [file 9448058]
